# Supplementary material
Source: MDPI journal article supplement (https://www.mdpi.com/2073-4433/13/2/225)
Supplement: s1 [file s1]

Supplementary materials

# Investigation of the Long-Term Trends in the Streamflow due to Climate Change and Urbanization for a Great Lakes Watershed

Elizabeth Philip <sup>1,\*</sup>, Ramesh P. Rudra <sup>1</sup>, Pradeep K. Goel <sup>2</sup> and Syed I. Ahmed <sup>1</sup>

<sup>1</sup> School of Engineering, University of Guelph, ON N1G 2W1, Canada, rrudra@uoguelph.ca (R.P.R.), sahmed@uoguelph.ca (S.I.A.)  
<sup>2</sup> Ministry of the Environment, Conservation and Parks, Etobicoke, ON M7A 1N3 Canada, pradeep.goel@ontario.ca  
\* Correspondence: elizabeth.philip@ltvca.ca

**Table S1.** Summary of the trend analysis for the temperature, precipitation, and evapotranspiration variables annually, seasonally, and monthly.

|           | Temperature |         |        |            |         |        | Precipitation |         |         |            |         |         | Evapotranspiration |         |        |
|-----------|-------------|---------|--------|------------|---------|--------|---------------|---------|---------|------------|---------|---------|--------------------|---------|--------|
|           | Orangeville |         |        | Georgetown |         |        | Orangeville   |         |         | Georgetown |         |         | Watershed average  |         |        |
| Time      | Tau         | p-value | Slope  | Tau        | p-value | Slope  | Tau           | p-value | Slope   | Tau        | p-value | Slope   | Tau                | p-value | Slope  |
| January   | −0.001      | 0.992   | 0.000  | 0.102      | 0.214   | 0.023  | 0.2580        | 0.0016  | 0.5464  | 0.0890     | 0.2780  | 0.1704  | −0.184             | 0.023   | −0.057 |
| February  | 0.075       | 0.364   | 0.015  | 0.351      | 0.000   | 0.093  | 0.2166        | 0.0081  | 0.3970  | 0.1213     | 0.1388  | 0.2537  | −0.172             | 0.033   | −0.063 |
| March     | 0.140       | 0.087   | 0.021  | −0.008     | 0.927   | −0.001 | 0.0157        | 0.8512  | 0.0378  | 0.0211     | 0.7999  | 0.0370  | −0.129             | 0.110   | −0.049 |
| April     | 0.040       | 0.630   | 0.006  | 0.088      | 0.285   | 0.012  | 0.0083        | 0.9233  | 0.0140  | 0.1193     | 0.1457  | 0.2593  | 0.119              | 0.141   | 0.046  |
| May       | 0.122       | 0.137   | 0.018  | 0.035      | 0.670   | 0.006  | 0.1859        | 0.0231  | 0.3400  | 0.2108     | 0.0100  | 0.4938  | 0.257              | 0.001   | 0.157  |
| June      | 0.080       | 0.330   | 0.008  | 0.526      | 0.000   | 0.065  | 0.1362        | 0.0963  | 0.2435  | 0.0882     | 0.2825  | 0.2250  | 0.178              | 0.028   | 0.097  |
| July      | 0.149       | 0.069   | 0.014  | 0.319      | 0.000   | 0.036  | 0.0812        | 0.3228  | 0.2150  | 0.0174     | 0.8353  | 0.0594  | 0.141              | 0.081   | 0.086  |
| August    | 0.108       | 0.189   | 0.011  | 0.310      | 0.000   | 0.037  | −0.1010       | 0.2180  | −0.2116 | −0.1126    | 0.1695  | −0.2964 | 0.065              | 0.422   | 0.027  |
| September | 0.205       | 0.012   | 0.020  | 0.446      | 0.000   | 0.055  | 0.0990        | 0.2276  | 0.1667  | 0.0489     | 0.5531  | 0.1108  | −0.025             | 0.759   | −0.015 |
| October   | −0.057      | 0.487   | −0.007 | 0.381      | 0.000   | 0.050  | 0.2468        | 0.0026  | 0.7264  | 0.1391     | 0.0894  | 0.3906  | −0.002             | 0.988   | 0.000  |
| November  | −0.048      | 0.556   | −0.007 | 0.172      | 0.036   | 0.022  | 0.2455        | 0.0027  | 0.5352  | 0.0745     | 0.3641  | 0.1791  | −0.178             | 0.027   | −0.041 |
| December  | 0.106       | 0.198   | 0.018  | 0.234      | 0.004   | 0.042  | 0.2944        | 0.0003  | 0.8111  | 0.0791     | 0.3354  | 0.1636  | −0.165             | 0.041   | −0.040 |
| Winter    | 0.161       | 0.013   | 0.013  | 0.275      | 0.001   | 0.038  | 0.2120        | 0.0096  | 0.9205  | 0.1188     | 0.1471  | 0.5000  | −0.208             | 0.010   | −0.156 |
| Spring    | 0.223       | 0.006   | 0.016  | 0.318      | 0.000   | 0.028  | 0.1164        | 0.1557  | 0.4158  | 0.1892     | 0.0208  | 1.0167  | 0.285              | 0.000   | 0.334  |
| Summer    | 0.223       | 0.006   | 0.016  | 0.413      | 0.000   | 0.040  | 0.0224        | 0.7882  | 0.0857  | −0.0145    | 0.8631  | −0.1086 | 0.130              | 0.107   | 0.138  |
| Autumn    | 0.006       | 0.943   | 0.000  | 0.388      | 0.000   | 0.039  | 0.3259        | 0.0001  | 1.8659  | 0.1371     | 0.0943  | 0.6586  | −0.146             | 0.071   | −0.082 |
| Annual    | 0.164       | 0.046   | 0.009  | 0.441      | 0.000   | 0.033  | 0.3694        | 0.0000  | 3.3775  | 0.1876     | 0.0219  | 1.6972  | 0.071              | 0.382   | 0.128  |

**Table S2.** Summary of the trend analysis of the streamflow. Period A, 1920–1939; Period B, 1940–1959; Period C, 1960–1979; Period D, 1980–1999; Period E, 2000–2019.

| Period A    |       |         |             | Period B |         |             | Period C |         |             | Period D |         |             | Period E |         |             |
|-------------|-------|---------|-------------|----------|---------|-------------|----------|---------|-------------|----------|---------|-------------|----------|---------|-------------|
| Streamflow  |       |         |             |          |         |             |          |         |             |          |         |             |          |         |             |
|             | Tau   | p-value | Sen's slope | Tau      | p-value | Sen's slope | Tau      | p-value | Sen's slope | Tau      | p-value | Sen's slope | Tau      | p-value | Sen's slope |
| Cata-ract   | 0.187 | 0.29    | 0.009       | 0.167    | 0.327   | 0.012       | 0.404    | 0.016   | 0.034       | −0.116   | 0.495   | −0.01       | 0.301    | 0.069   | 0.018       |
| Orangeville |       |         |             |          |         |             |          |         |             | −0.258   | 0.132   | −0.005      | 0.463    | 0.004   | 0.01        |
| Erin-dale   |       |         |             |          |         |             | 0.434    | 0.009   | 0.114       |          |         |             |          |         |             |
| WB Norval   |       |         |             |          |         |             | 0.404    | 0.016   | 0.013       | −0.242   | 0.146   | −0.013      | 0.147    | 0.386   | 0.008       |
| Winter      |       |         |             |          |         |             |          |         |             |          |         |             |          |         |             |
| Cata-ract   | 0.241 | 0.161   | 0.046       | 0.058    | 0.746   | 0.017       | 0.368    | 0.029   | 0.041       | 0.058    | 0.746   | 0.004       | 0.284    | 0.086   | 0.024       |
| Orangeville |       |         |             |          |         |             |          |         |             | −0.059   | 0.753   | −0.001      | 0.347    | 0.034   | 0.011       |
| Erin-dale   |       |         |             |          |         |             | 0.411    | 0.011   | 0.189       |          |         |             |          |         |             |
| WB Norval   |       |         |             |          |         |             | 0.27     | 0.115   | 0.018       | 0.042    | 0.823   | 0.007       | 0.063    | 0.725   | 0.008       |
| Spring      |       |         |             |          |         |             |          |         |             |          |         |             |          |         |             |
| Cata-ract   | 0.112 | 0.528   | 0.008       | 0.054    | 0.769   | 0.002       | 0.439    | 0.008   | 0.068       | −0.053   | 0.773   | −0.013      | 0.322    | 0.052   | 0.047       |
| Orangeville |       |         |             |          |         |             |          |         |             | 0.018    | 0.945   | 0.001       | 0.442    | 0.006   | 0.015       |
| Erin-dale   |       |         |             |          |         |             | 0.263    | 0.113   | 0.213       |          |         |             |          |         |             |
| WB Norval   |       |         |             |          |         |             | 0.411    | 0.016   | 0.05        | −0.011   | 0.975   | −0.002      | 0.19     | 0.26    | 0.021       |
| Summer      |       |         |             |          |         |             |          |         |             |          |         |             |          |         |             |
| Cata-ract   | −0.06 | 0.752   | −0.002      | 0.115    | 0.512   | 0.005       | 0.333    | 0.049   | 0.027       | −0.211   | 0.209   | −0.015      | 0.232    | 0.165   | 0.022       |
| Orangeville |       |         |             |          |         |             |          |         |             | −0.17    | 0.332   | −0.004      | 0.453    | 0.005   | 0.009       |
| Erin-dale   |       |         |             |          |         |             | 0.364    | 0.027   | 0.07        |          |         |             |          |         |             |
| WB Norval   |       |         |             |          |         |             | 0.252    | 0.143   | 0.009       | −0.269   | 0.105   | −0.011      | 0.126    | 0.461   | 0.003       |
| Autumn      |       |         |             |          |         |             |          |         |             |          |         |             |          |         |             |
| Cata-ract   | 0.177 | 0.309   | 0.01        | 0.076    | 0.671   | 0.004       | 0.359    | 0.036   | 0.034       | −0.296   | 0.074   | −0.022      | 0.147    | 0.386   | 0.01        |
| Orangeville |       |         |             |          |         |             |          |         |             | −0.34    | 0.046   | −0.009      | 0.168    | 0.319   | 0.006       |
| Erin-dale   |       |         |             |          |         |             | 0.253    | 0.128   | 0.098       |          |         |             |          |         |             |
| WB Norval   |       |         |             |          |         |             | 0.228    | 0.186   | 0.018       | −0.368   | 0.024   | −0.031      | 0.126    | 0.461   | 0.008       |

**Table S3.** Summary of the trend analysis of the baseflow. Period A, 1920–1939; Period B, 1940–1959; Period C, 1960–1979; Period D, 1980–1999; Period E, 2000–2019.

| Period A  |             |                 | Period B    |       |                 | Period C    |       |                 | Period D    |        |                 | Period E    |       |                 |             |
|-----------|-------------|-----------------|-------------|-------|-----------------|-------------|-------|-----------------|-------------|--------|-----------------|-------------|-------|-----------------|-------------|
| Baseflow  |             |                 |             |       |                 |             |       |                 |             |        |                 |             |       |                 |             |
|           | Tau         | <i>p</i> -value | Sen's slope | Tau   | <i>p</i> -value | Sen's slope | Tau   | <i>p</i> -value | Sen's slope | Tau    | <i>p</i> -value | Sen's slope | Tau   | <i>p</i> -value | Sen's slope |
| Annual    |             |                 |             |       |                 |             |       |                 |             |        |                 |             |       |                 |             |
| Cata-ract | 0.24        | 0.164           | 0.004       | 0.19  | 0.26            | 0.007       | 0.462 | 0.005           | 0.032       | −0.147 | 0.386           | −0.007      | 0.263 | 0.113           | 0.013       |
|           | Orangeville |                 |             |       |                 |             |       |                 |             | −0.146 | 0.406           | −0.003      | 0.474 | 0.003           | 0.007       |
| Erin-dale |             |                 |             |       |                 |             | 0.358 | 0.028           | 0.066       |        |                 |             |       |                 |             |
|           | WB Norval   |                 |             |       |                 |             | 0.333 | 0.049           | 0.011       | −0.284 | 0.086           | −0.011      | 0.19  | 0.26            | 0.007       |
| Winter    |             |                 |             |       |                 |             |       |                 |             |        |                 |             |       |                 |             |
| Cata-ract | 0.345       | 0.041           | 0.039       | 0.042 | 0.823           | 0.005       | 0.275 | 0.108           | 0.027       | 0.011  | 0.975           | 0           | 0.19  | 0.26            | 0.015       |
|           | Orangeville |                 |             |       |                 |             |       |                 |             | −0.158 | 0.368           | −0.004      | 0.379 | 0.02            | 0.007       |
| Erin-dale |             |                 |             |       |                 |             | 0.295 | 0.074           | 0.112       |        |                 |             |       |                 |             |
|           | WB Norval   |                 |             |       |                 |             | 0.064 | 0.73            | 0.003       | −0.2   | 0.233           | −0.012      | 0.011 | 0.975           | 0.001       |
| Spring    |             |                 |             |       |                 |             |       |                 |             |        |                 |             |       |                 |             |
| Cata-ract | 0.053       | 0.783           | 0.004       | 0.168 | 0.319           | 0.017       | 0.427 | 0.01            | 0.044       | 0.021  | 0.924           | 0.002       | 0.295 | 0.074           | 0.026       |
|           | Orangeville |                 |             |       |                 |             |       |                 |             | 0.193  | 0.267           | 0.006       | 0.505 | 0.001           | 0.011       |
| Erin-dale |             |                 |             |       |                 |             | 0.358 | 0.028           | 0.174       |        |                 |             |       |                 |             |
|           | WB Norval   |                 |             |       |                 |             | 0.509 | 0.002           | 0.038       | 0.042  | 0.823           | 0.003       | 0.158 | 0.351           | 0.015       |
| Summer    |             |                 |             |       |                 |             |       |                 |             |        |                 |             |       |                 |             |
| Cata-ract | −0.158      | 0.368           | −0.004      | 0.211 | 0.209           | 0.011       | 0.427 | 0.01            | 0.024       | −0.116 | 0.501           | −0.005      | 0.337 | 0.04            | 0.023       |
|           | Orangeville |                 |             |       |                 |             |       |                 |             | −0.018 | 0.945           | 0           | 0.432 | 0.007           | 0.009       |
| Erin-dale |             |                 |             |       |                 |             | 0.295 | 0.074           | 0.295       |        |                 |             |       |                 |             |
|           | WB Norval   |                 |             |       |                 |             | 0.252 | 0.143           | 0.007       | −0.179 | 0.288           | −0.004      | 0.179 | 0.288           | 0.005       |
| Autumn    |             |                 |             |       |                 |             |       |                 |             |        |                 |             |       |                 |             |
| Cata-ract | 0.216       | 0.211           | 0.009       | 0.195 | 0.243           | 0.012       | 0.462 | 0.005           | 0.032       | −0.232 | 0.165           | −0.014      | 0.158 | 0.351           | 0.008       |
|           | Orangeville |                 |             |       |                 |             |       |                 |             | −0.24  | 0.164           | −0.003      | 0.232 | 0.165           | 0.005       |
| Erin-dale |             |                 |             |       |                 |             | 0.347 | 0.034           | 0.082       |        |                 |             |       |                 |             |
|           | WB Norval   |                 |             |       |                 |             | 0.287 | 0.093           | 0.013       | −0.368 | 0.024           | −0.021      | 0.105 | 0.542           | 0.005       |

**Table S4.** Summary of the FDC 10% exceedance and 10:90% exceedance ratio. Period A, 1920–1939; Period B, 1940–1959; Period C, 1960–1979; Period D, 1980–1999; Period E, 2000–2019.

| Period            | Annual | Winter | Spring | Summer | Autumn |
|-------------------|--------|--------|--------|--------|--------|
| Cataract          |        |        |        |        |        |
| 10% exceedance    |        |        |        |        |        |
| POR               | 3.11   | 4.31   | 4.57   | 1.65   | 2.11   |
| A                 | 3.17   | 5.15   | 4.64   | 1.15   | 1.90   |
| B                 | 3.00   | 3.99   | 5.04   | 1.39   | 2.01   |
| C                 | 2.76   | 3.43   | 4.19   | 1.61   | 2.11   |
| D                 | 3.07   | 3.79   | 3.91   | 1.78   | 2.49   |
| E                 | 3.31   | 3.51   | 4.69   | 2.04   | 2.25   |
| 10:90% exceedance |        |        |        |        |        |
| POR               | 4.42   | 5.85   | 5.04   | 3.03   | 2.76   |
| A                 | 5.09   | 7.91   | 5.46   | 2.26   | 2.79   |
| B                 | 4.82   | 5.64   | 6.59   | 2.73   | 2.63   |
| C                 | 3.84   | 4.57   | 4.77   | 2.72   | 2.77   |
| D                 | 3.30   | 3.64   | 3.55   | 2.21   | 2.44   |
| E                 | 3.25   | 3.11   | 3.49   | 2.41   | 2.21   |
| Erindale          |        |        |        |        |        |
| 10% exceedance    |        |        |        |        |        |
| POR               | 15.60  | 25.25  | 21.74  | 5.97   | 10.60  |
| C                 | 16.30  | 27.60  | 23.75  | 5.54   | 9.88   |
| 10:90% exceedance |        |        |        |        |        |
| POR               | 6.64   | 8.46   | 6.82   | 3.23   | 4.25   |
| C                 | 6.68   | 9.86   | 6.99   | 2.87   | 3.92   |
| Orangeville       |        |        |        |        |        |
| 10% exceedance    |        |        |        |        |        |
| POR               | 1.00   | 1.17   | 1.39   | 0.64   | 0.78   |
| D                 | 0.94   | 1.17   | 1.17   | 0.58   | 0.81   |
| E                 | 1.08   | 1.13   | 1.52   | 0.72   | 0.77   |
| 10:90% exceedance |        |        |        |        |        |
| POR               | 3.66   | 3.76   | 4.54   | 2.74   | 2.56   |
| D                 | 3.90   | 3.69   | 4.42   | 2.78   | 3.26   |
| E                 | 3.15   | 3.17   | 3.69   | 2.30   | 2.27   |
| WB Norval         |        |        |        |        |        |
| 10% exceedance    |        |        |        |        |        |
| POR               | 2.77   | 3.86   | 3.99   | 1.07   | 1.94   |
| C                 | 2.74   | 4.13   | 4.178  | 0.951  | 1.68   |
| D                 | 2.75   | 4.035  | 3.53   | 1.24   | 2.095  |
| E                 | 2.8    | 3.345  | 4.185  | 1.08   | 1.93   |
| 10:90% exceedance |        |        |        |        |        |
| POR               | 7.05   | 7.61   | 6.63   | 3.26   | 4.90   |
| C                 | 7.33   | 8.69   | 7.64   | 3.03   | 4.59   |
| D                 | 7.16   | 8.52   | 6.10   | 3.88   | 5.36   |
| E                 | 6.67   | 5.69   | 5.83   | 3.05   | 4.66   |

**Table S5.** Summary of the BFI for different periods. Period A, 1920–1939; Period B, 1940–1959; Period C, 1960–1979; Period D, 1980–1999; Period E, 2000–2019.

|             | Period A | Period B | Period C | Period D | Period E |
|-------------|----------|----------|----------|----------|----------|
| Annual      |          |          |          |          |          |
| Cataract    | 0.559    | 0.557    | 0.635    | 0.675    | 0.686    |
| Orangeville |          |          |          | 0.622    | 0.667    |
| Erindale    |          |          | 0.515    |          | 0.574    |
| WB Norval   |          |          | 0.523    | 0.539    | 0.571    |
| Winter      |          |          |          |          |          |
| Cataract    | 0.530    | 0.4975   | 0.5806   | 0.599    | 0.647    |
| Orangeville |          |          |          | 0.576    | 0.639    |
| Erindale    |          |          | 0.424    |          | 0.540    |
| WB Norval   |          |          | 0.459    | 0.465    | 0.520    |
| Spring      |          |          |          |          |          |
| Cataract    | 0.486    | 0.4977   | 0.5787   | 0.663    | 0.637    |
| Orangeville |          |          |          | 0.587    | 0.602    |
| Erindale    |          |          | 0.505    |          | 0.552    |
| WB Norval   |          |          | 0.514    | 0.567    | 0.559    |
| Summer      |          |          |          |          |          |
| Cataract    | 0.679    | 0.6852   | 0.7402   | 0.753    | 0.770    |
| Orangeville |          |          |          | 0.670    | 0.739    |
| Erindale    |          |          | 0.691    |          | 0.638    |
| WB Norval   |          |          | 0.631    | 0.586    | 0.671    |
| Autumn      |          |          |          |          |          |
| Cataract    | 0.693    | 0.6843   | 0.725    | 0.738    | 0.747    |
| Orangeville |          |          |          | 0.690    | 0.739    |
| Erindale    |          |          | 0.605    |          | 0.623    |
| WB Norval   |          |          | 0.586    | 0.577    | 0.614    |

**Table S6.** Summary of the POT analysis parameters and return level for 2 years, 10 years, 20 years, 100 years, and its derivative. Period A, 1920–1939; Period B, 1940–1959; Period C, 1960–1979; Period D, 1980–1999; Period E, 2000–2019.

|             | Scale | Shape | 2-year | 10-year | 20-year | 100-year | 100/2 year | EVI  |
|-------------|-------|-------|--------|---------|---------|----------|------------|------|
| Cataract    |       |       |        |         |         |          |            |      |
| POR         | 4.78  | 0.13  | 23.68  | 36.39   | 42.77   | 60.07    | 2.54       | 0.35 |
| Period A    | 7.46  | −0.01 | 28.33  | 39.74   | 44.57   | 55.63    | 1.96       | 0.29 |
| Period B    | 5.34  | 0.13  | 27.19  | 41.71   | 48.98   | 68.70    | 2.53       | 0.35 |
| Period C    | 4.71  | −0.06 | 18.96  | 25.01   | 27.44   | 32.70    | 1.73       | 0.24 |
| Period D    | 3.64  | 0.15  | 17.97  | 27.65   | 32.58   | 46.18    | 2.57       | 0.35 |
| Period E    | 2.94  | 0.07  | 15.19  | 21.19   | 23.97   | 30.97    | 2.04       | 0.28 |
| Winter      | 5.44  | 0.11  | 30.05  | 44.24   | 51.18   | 69.51    | 2.31       | 0.32 |
| Summer      | 0.64  | 0.37  | 6.98   | 12.45   | 16.00   | 28.80    | 4.12       | 0.44 |
| Spring      | 4.60  | 0.12  | 27.33  | 39.72   | 45.81   | 61.98    | 2.27       | 0.31 |
| Autumn      | 1.59  | 0.29  | 8.51   | 14.52   | 18.13   | 29.95    | 3.52       | 0.41 |
| Erindale    |       |       |        |         |         |          |            |      |
| POR         | 16.12 | 0.22  | 118.25 | 189.93  | 229.39  | 347.50   | 2.94       | 0.38 |
| Period C    | 15.33 | 0.22  | 117.65 | 188.36  | 227.43  | 344.82   | 2.93       | 0.38 |
| Winter      | 17.02 | 0.13  | 126.66 | 182.59  | 210.65  | 286.76   | 2.26       | 0.31 |
| Summer      | 4.32  | 0.39  | 40.57  | 78.16   | 103.05  | 194.28   | 4.79       | 0.48 |
| Spring      | 16.97 | 0.23  | 148.47 | 240.13  | 291.60  | 448.93   | 3.02       | 0.38 |
| Autumn      | 11.04 | 0.52  | 94.48  | 219.24  | 314.98  | 730.51   | 7.73       | 0.57 |
| Orangeville |       |       |        |         |         |          |            |      |
| POR         | 0.95  | 0.14  | 5.24   | 7.75    | 9.02    | 12.46    | 2.38       | 0.32 |
| Period D    | 0.87  | 0.23  | 5.34   | 8.52    | 10.30   | 15.68    | 2.93       | 0.37 |
| Period E    | 1.02  | 0.09  | 5.29   | 7.61    | 8.72    | 11.60    | 2.19       | 0.30 |
| Winter      | 1.13  | 0.13  | 6.68   | 9.78    | 11.33   | 15.49    | 2.32       | 0.32 |
| Summer      | 0.55  | 0.08  | 2.96   | 4.18    | 4.76    | 6.23     | 2.10       | 0.29 |
| Spring      | 0.97  | 0.06  | 5.68   | 7.71    | 8.66    | 11.02    | 1.94       | 0.26 |
| Autumn      | 0.36  | 0.23  | 2.94   | 4.50    | 5.37    | 8.01     | 2.73       | 0.35 |
| WB Norval   |       |       |        |         |         |          |            |      |
| POR         | 2.02  | 0.09  | 13.22  | 18.36   | 20.82   | 27.19    | 2.06       | 0.28 |
| Period C    | 2.36  | 0.04  | 13.80  | 18.54   | 20.68   | 25.93    | 1.88       | 0.26 |
| Period D    | 2.01  | 0.14  | 14.32  | 20.84   | 24.14   | 33.19    | 2.32       | 0.31 |
| Period E    | 1.78  | 0.06  | 11.30  | 15.06   | 16.79   | 21.07    | 1.86       | 0.25 |
| Winter      | 2.47  | 0.02  | 15.09  | 19.60   | 21.60   | 26.37    | 1.75       | 0.23 |
| Summer      | 1.22  | 0.28  | 7.93   | 13.60   | 16.94   | 27.65    | 3.49       | 0.42 |
| Spring      | 1.91  | 0.09  | 14.42  | 19.55   | 22.01   | 28.36    | 1.97       | 0.26 |
| Autumn      | 1.24  | 0.19  | 13.50  | 15.91   | 15.91   | 22.87    | 1.69       | 0.15 |

Table S7. Summary of the trend analysis for the period 1971–2019.

|         | Orangeville |                 |             | Georgetown |                 |             | Orangeville   |                 |             | Georgetown |                 |             | Watershed average  |                 |             |
|---------|-------------|-----------------|-------------|------------|-----------------|-------------|---------------|-----------------|-------------|------------|-----------------|-------------|--------------------|-----------------|-------------|
|         | Tau         | <i>p</i> -value | Sen's slope | Tau        | <i>p</i> -value | Sen's slope | Tau           | <i>p</i> -value | Sen's slope | Tau        | <i>p</i> -value | Sen's slope | Tau                | <i>p</i> -value | Sen's slope |
|         | Temperature |                 |             |            |                 |             | Precipitation |                 |             |            |                 |             | Evapotranspiration |                 |             |
| An-nual | 0.224       | 0.023           | 0.02        | 0.512      | 0               | 0.059       | 0.119         | 0.231           | 1.453       | 0.134      | 0.176           | 1.78        | 0.106              | 0.29            | 0.36        |
| Winter  | 0.206       | 0.038           | 0.02        | 0.327      | 0.001           | 0.068       | −0.052        | 0.605           | −0.285      | 0.138      | 0.165           | 0.748       | −0.094             | 0.351           | −0.103      |
| Spring  | 0.252       | 0.011           | 0.02        | 0.252      | 0.011           | 0.02        | 0.174         | 0.079           | 0.842       | 0.173      | 0.08            | 1.292       | 0.362              | 0               | 0.711       |
| Sum-mer | 0.252       | 0.011           | 0.02        | 0.514      | 0               | 0.071       | 0.011         | 0.918           | 0.047       | −0.005     | 0.966           | −0.058      | 0.043              | 0.67            | 0.055       |
| Au-tumn | 0.026       | 0.803           | 0.004       | 0.43       | 0               | 0.061       | 0.003         | 0.979           | 0.016       | 0.059      | 0.558           | 0.358       | −0.279             | 0.005           | −0.246      |

Table S8. Summary of the trend analysis for the period 1971–2019.

| Period | Cataract |                 |             | WB Norval |                 |             |
|--------|----------|-----------------|-------------|-----------|-----------------|-------------|
|        | Tau      | <i>p</i> -value | Sen's slope | Tau       | <i>p</i> -value | Sen's slope |
| Annual | 0.219    | 0.027           | 0.006       | 0.049     | 0.625           | 0.001       |
| Winter | 0.202    | 0.042           | 0.006       | 0.088     | 0.379           | 0.004       |
| Spring | 0.237    | 0.017           | 0.014       | 0.095     | 0.339           | 0.005       |
| Summer | 0.187    | 0.060           | 0.005       | 0.057     | 0.569           | 0.001       |
| Autumn | 0.065    | 0.518           | 0.002       | 0.009     | 0.938           | 0.001       |
